# Supplementary material for: Hector V3.1.1: functionality and performance of a reduced-complexity climate model
Source: Copernicus journal article supplement (doi:10.5194/egusphere-2023-1477), 2023-09-07
Supplement: Supplementary file 1 [file egusphere-2023-1477-supplement.pdf]

# 1 Supplement to Hector V3.1: functionality and performance of a 2 reduced-complexity climate model

## 3 1 Radiative Forcing

| <b>Name as it appears in Hector</b> | <b>Description</b>                                | <b>Source</b>                        |
|-------------------------------------|---------------------------------------------------|--------------------------------------|
| RF_albedo                           | surface albedo                                    | externally defined input time series |
| RF_CO2                              | CO2 radiative forcing                             | calculated from concentrations       |
| RF_N2O                              | N2O radiative forcing                             | calculated from concentrations       |
| RF_H2O_strat                        | stratopsheric water vapor radiative forcing       | calculated from concentrations       |
| RF_O3_trop                          | tropsheric ozone radiative forcing                | calculated from concentrations       |
| RF_BC                               | BC radiative forcing                              | calculated from emissions            |
| RF_OC                               | OC radiative forcing                              | calculated from emissions            |
| RF_NH3                              | NH3 radiative forcing                             | calculated from emissions            |
| RF_SO2                              | SO2 radiative forcing                             | calculated from emissions            |
| RF_aci                              | radiative forcing from aerosol cloud interactions | calculated from emissions            |
| RF_vol                              | radiative forcing from volcanic activity          | externally defined input time series |
| RF_misc                             | radiative forcing from miscellaneous sources      | externally defined input time series |
| FadjCF4                             | CF4 radiative forcing                             | calculated from concentrations       |
| FadjC2F6                            | C2F6 radiative forcing                            | calculated from concentrations       |
| FadjHFC23                           | HFC23 radiative forcing                           | calculated from concentrations       |
| FadjHFC32                           | HFC32 radiative forcing                           | calculated from concentrations       |
| FadjHFC4310                         | HFC4310 radiative forcing                         | calculated from concentrations       |

|               |                                   |                                |
|---------------|-----------------------------------|--------------------------------|
| FadjHFC125    | HFC125 radiative forcing          | calculated from concentrations |
| FadjHFC134a   | HFC134a radiative forcing         | calculated from concentrations |
| FadjHFC143a   | HFC143a radiative forcing         | calculated from concentrations |
| FadjHFC227ea  | HFC227ea radiative forcing        | calculated from concentrations |
| FadjHFC245fa  | HFC245fa radiative forcing        | calculated from concentrations |
| FadjSF6       | SF6 radiative forcing             | calculated from concentrations |
| FadjCFC11     | CFC11 radiative forcing           | calculated from concentrations |
| FadjCFC12     | CFC12 radiative forcing           | calculated from concentrations |
| FadjCFC113    | CFC113 radiative forcing          | calculated from concentrations |
| FadjCFC114    | CFC114 radiative forcing          | calculated from concentrations |
| FadjCFC115    | CFC115 radiative forcing          | calculated from concentrations |
| FadjCCl4      | CCl4 radiative forcing            | calculated from concentrations |
| FadjCH3CCl3   | CH3CCl3 radiative forcing         | calculated from concentrations |
| FadjHCFC22    | HCFC22 radiative forcing          | calculated from concentrations |
| FadjHCFC141b  | HCFC141b radiative forcing        | calculated from concentrations |
| FadjHCFC142b  | HCFC142b radiative forcing        | calculated from concentrations |
| Fadjhalon1211 | halocarbon 1211 radiative forcing | calculated from concentrations |
| Fadjhalon1301 | halocarbon 1301 radiative forcing | calculated from concentrations |
| Fadjhalon2402 | halocarbon 2402 radiative forcing | calculated from concentrations |
| FadjCH3Cl     | CH3Cl radiative forcing           | calculated from concentrations |
| FadjCH3Br     | CH3Br radiative forcing           | calculated from concentrations |
| FCH4          | CH4 radiative forcing             | calculated from concentrations |

4 SI Table 1: The radiative forcing equations and parameter values are identical to those reported in (Smith et al. 2021) and  
5 reproduced here for readers' convenience.

## 6 1.1 CO2

7 Where  $N$  and  $C$  are atmospheric concentrations at the current timestep of N2O (in ppb) and CO2 (in  
8 ppm), respectively, and  $C_0$  is the pre-industrial (1850 AD) concentration of CO2 (in ppm), the  
9 equations use the following parameterizations.

10

$$C_{\alpha max} = C_0 - \frac{b_1}{2a_1} \quad (1)$$

11  
12  
13

$$\alpha' = \begin{cases} d_1 - \frac{b_1^2}{4a_1} & C > C_{\alpha max} \\ d_1 + a_1(C - C_0)^2 + b_1(C - C_0) & C_0 < C < C_{\alpha max} \\ d_1 & C < C_0 \end{cases} \quad (2)$$

14  
15

$$\alpha_{N_2O} = c_1\sqrt{N} \quad (3)$$

16

$$SARF_{CO_2} = (\alpha' + \alpha_{N_2O})\ln(C/C_0) \quad (4)$$

17

$$RF_{CO_2} = \delta_{CO_2}SSARF_{CO_2} + SARF_{CO_2} \quad (5)$$

18

| Equation                          | Parameters      | Value      | Units                                    | Source                                                                                                                                                            |
|-----------------------------------|-----------------|------------|------------------------------------------|-------------------------------------------------------------------------------------------------------------------------------------------------------------------|
| CO <sub>2</sub> Radiative Forcing | $a_1$           | -2.4785e-7 | (W m <sup>-2</sup> ppm <sup>-2</sup> )   | Table 7.SM.1(Smith et al. 2021)                                                                                                                                   |
| CO <sub>2</sub> Radiative Forcing | $b_1$           | 7.5906e-4  | (W m <sup>-2</sup> ppm <sup>-2</sup> )   | Table 7.SM.1(Smith et al. 2021)                                                                                                                                   |
| CO <sub>2</sub> Radiative Forcing | $c_1$           | -2.1492e-3 | (W m <sup>-2</sup> ppb <sup>-1/2</sup> ) | Table 7.SM.1(Smith et al. 2021)                                                                                                                                   |
| CO <sub>2</sub> Radiative Forcing | $d_1$           | 5.2488     | (W m <sup>-2</sup> )                     | Table 7.SM.1(Smith et al. 2021)                                                                                                                                   |
| CO <sub>2</sub> Radiative Forcing | $\delta_{CO_2}$ | 0.05       | unitless                                 | 7.3.2.3 (Forster, P., T. Storelvmo, K. Armour, W. Collins, J. L. Dufresne, D. Frame, D. J. Lunt, T. Mauritsen, M. D. Palmer, M. Watanabe, M. Wild, H. Zhang 2021) |

19 **SI Table 2: Parameter values used to calculate CO<sub>2</sub> radiative forcing.**

20 **1.2 N<sub>2</sub>O**

21 Where  $N$ ,  $C$ , and  $M$  are atmospheric concentrations of N<sub>2</sub>O (ppb), CO<sub>2</sub> (ppm), and CH<sub>4</sub> (ppb),  
 22 respectively, and  $N_0$  is the pre-industrial (1850 AD) concentration of N<sub>2</sub>O (ppb), the equations use the  
 23 following parameterizations.  
 24

$$SARF_{N_2O} = (a_1\sqrt{C} + b_2\sqrt{N} + c_2\sqrt{M} + d_2)(\sqrt{N} - \sqrt{N_0}) \quad (6)$$

25

$$RF_{N_2O} = \delta_{N_2O}SARF_{N_2O} + SARF_{N_2O} \quad (7)$$

26

| Equation                           | Parameters                  | Value      | Units                                    | Source                          |
|------------------------------------|-----------------------------|------------|------------------------------------------|---------------------------------|
| N <sub>2</sub> O radiative forcing | a <sub>2</sub>              | -3.4197e-4 | (W m <sup>-2</sup> ppm <sup>-1</sup> )   | Table 7.SM.1(Smith et al. 2021) |
| N <sub>2</sub> O radiative forcing | b <sub>2</sub>              | 2.5455e-4  | (W m <sup>-2</sup> ppb <sup>-1</sup> )   | Table 7.SM.1(Smith et al. 2021) |
| N <sub>2</sub> O radiative forcing | c <sub>2</sub>              | -2.4357e-4 | (W m <sup>-2</sup> ppb <sup>-1</sup> )   | Table 7.SM.1(Smith et al. 2021) |
| N <sub>2</sub> O radiative forcing | d <sub>2</sub>              | 0.12173    | (W m <sup>-2</sup> ppb <sup>-1/2</sup> ) | Table 7.SM.1(Smith et al. 2021) |
| N <sub>2</sub> O radiative forcing | N <sub>0</sub>              | 273.87     | ppb                                      | Table 7.SM.1(Smith et al. 2021) |
| N <sub>2</sub> O radiative forcing | δ <sub>N<sub>2</sub>O</sub> | 0.05       | unitless                                 | 7.3.2.3 (Forster et al. 2021)   |

27 **SI Table 3: Parameter values used to calculate N<sub>2</sub>O radiative forcing.**

28 **1.3 CH<sub>4</sub>**

29 Where  $N$  and  $M$  are atmospheric concentrations of N<sub>2</sub>O (ppb) and CH<sub>4</sub> (ppb), respectively, and  $M_0$  is the  
 30 pre-industrial (1850 AD) concentration of CH<sub>4</sub>, the equations use the following parameterizations.  
 31

$$SARF_{CH_4} = (a_3\sqrt{M} + b_3\sqrt{N} + d_3)(\sqrt{M} - \sqrt{M_0}) \quad (8)$$

32

$$RF_{CH_4} = \delta_{CH_4}SARF_{CH_4} + SARF_{CH_4} \quad (9)$$

33

| Equation | Parameters | Value | Units | Source |
|----------|------------|-------|-------|--------|
|----------|------------|-------|-------|--------|

|                                   |                 |            |                                       |                                 |
|-----------------------------------|-----------------|------------|---------------------------------------|---------------------------------|
| CH <sub>4</sub> radiative forcing | a <sub>3</sub>  | -8.9603e-5 | W m <sup>-2</sup> ppb <sup>-1</sup>   | Table 7.SM.1(Smith et al. 2021) |
| CH <sub>4</sub> radiative forcing | b <sub>3</sub>  | -1.2462e-4 | W m <sup>-2</sup> ppb <sup>-1</sup>   | Table 7.SM.1(Smith et al. 2021) |
| CH <sub>4</sub> radiative forcing | d <sub>3</sub>  | 0.045194   | W m <sup>-2</sup> ppb <sup>-1/2</sup> | Table 7.SM.1(Smith et al. 2021) |
| CH <sub>4</sub> radiative forcing | $\delta_{CH_4}$ | -0.14      | unitless                              | 7.3.2.3 (Forster et al. 2021)   |

34 **SI Table 4: Parameter values used to calculate CH<sub>4</sub> radiative forcing.**

35 **1.4 Halocarbons**

36 For a particular Halocarbon species  $X$ , its radiative forcing is that species's atmospheric concentration,  
 37  $[X]$  (ppt), multiplied by its corresponding radiative efficiency,  $\rho_X$  and modified by that species'  
 38 tropospheric adjustment coefficient,  $\delta_X$ :  
 39

$$SARF_X = \rho_X [X] \quad (10)$$

40

$$RF_X = SARF_X + \delta_X SARF_X \quad (11)$$

41

| Halocarbon                    | $\tau$ (lifetime) | $\rho W m^{-2} ppt^{-1}$ (Radiative efficiency) | $\delta$ unitless (tropospheric adjustments) |
|-------------------------------|-------------------|-------------------------------------------------|----------------------------------------------|
| CF <sub>4</sub>               | 50000.0           | 0.000099                                        | 0                                            |
| C <sub>2</sub> F <sub>6</sub> | 10000.0           | 0.000261                                        | 0                                            |
| HFC-23                        | 228.0             | 0.000191                                        | 0                                            |
| HFC-32                        | 5.4               | 0.000111                                        | 0                                            |
| HFC-4310                      | 17.0              | 0.000357                                        | 0                                            |
| HFC-125                       | 30.0              | 0.000234                                        | 0                                            |
| HFC-134a                      | 14.0              | 0.000167                                        | 0                                            |
| HFC-143a                      | 51.0              | 0.000168                                        | 0                                            |
| HFC-227ea                     | 36.0              | 0.000273                                        | 0                                            |
| HFC-245fa                     | 7.9               | 0.000245                                        | 0                                            |
| SF <sub>6</sub>               | 3200.0            | 0.000567                                        | 0                                            |

|                                  |       |          |      |
|----------------------------------|-------|----------|------|
| CFC-11                           | 52.0  | 0.000259 | 0.13 |
| CFC-12                           | 102.0 | 0.00032  | 0.13 |
| CFC-113                          | 93.0  | 0.000301 | 0    |
| CFC-114                          | 189   | 0.000314 | 0    |
| CFC-115                          | 540   | 0.000246 | 0    |
| CCl <sub>4</sub>                 | 32    | 0.000166 | 0    |
| CH <sub>3</sub> CCl <sub>3</sub> | 5     | 0.000065 | 0    |
| halon-1211                       | 16.0  | 0.0003   | 0    |
| halon-1301                       | 72.0  | 0.000299 | 0    |
| halon-2402                       | 28.0  | 0.000312 | 0    |
| HCFC-22                          | 11.9  | 0.000214 | 0    |
| HCFC-141b                        | 9.4   | 0.000161 | 0    |
| HCFC-142b                        | 18.0  | 0.000193 | 0    |
| CH <sub>3</sub> Cl               | 0.9   | 0.000005 | 0    |
| CH <sub>3</sub> Br               | 0.8   | 0.000004 | 0    |

42 **SI Table 5: Halocarbon parameters from table 7.SM.7 (Smith et al. 2021).**

43 **1.5 Aerosols**

44 Direct aerosol radiative forcings for black carbon (BC), organic carbon (OC), SO<sub>2</sub>, and NH<sub>3</sub>, are  
45 modeled as a product of the emissions of that aerosol in that timestep (E; in units of Tg) and the  
46 aerosol's specific radiative efficiency,  $\rho$ .  
47

$$RF_{BC} = \rho_{BC} E_{BC} \quad (12)$$

48

$$RF_{OC} = \rho_{OC} E_{OC} \quad (13)$$

49

$$RF_{SO_2} = \rho_{SO_2} E_{SO_2} \quad (14)$$

50

$$RF_{NH_3} = \rho_{NH_3} E_{NH_3} \quad (15)$$

51

52 **1.6 Aerosol-cloud Interactions**

$$RF_{aci} = \rho_{aci} \ln \left( 1 + \frac{E_{SO_2}}{s_{SO_2}} + \frac{E_{BC+OC}}{s_{BC+OC}} \right) \quad (16)$$

53

(16)

| Parameter     | Value      | Units                                                 | Source                          |
|---------------|------------|-------------------------------------------------------|---------------------------------|
| $\rho_{BC}$   | 0.0508     | W yr m <sup>-2</sup> C Tg <sup>-1</sup>               | 7.SM.1.3 of (Smith et al. 2021) |
| $\rho_{OC}$   | -0.00621   | W yr m <sup>-2</sup> C Tg <sup>-1</sup>               | 7.SM.1.3 of (Smith et al. 2021) |
| $\rho_{SO_2}$ | -0.0000724 | W yr m <sup>-2</sup> S Gg <sup>-1</sup>               | 7.SM.1.3 of (Smith et al. 2021) |
| $\rho_{NH_3}$ | -0.00208   | W yr m <sup>-2</sup> NH <sub>3</sub> Tg <sup>-1</sup> | 7.SM.1.3 of (Smith et al. 2021) |

54

55 **SI Table 6: Parameter values used to calculate aerosol radiative forcing.**56 **2 Model Parameterization**

57 Table of the 24 ESM historical output files that were processed to find the global, high latitude, and low latitude mean  
 58 preindustrial sea surface temperature, which are used by Hector's component.

59

| Model         | Citation                                |
|---------------|-----------------------------------------|
| ACCESS-ESM1-5 | (Ziehn et al. 2019a)                    |
| CanESM5       | (Swart et al., 2019a)                   |
| EC-Earth3     | (EC-Earth Consortium (EC-Earth), 2019a) |
| MIROC6        | (Tatebe and Watanabe, 2018)             |
| MPI-ESM1-2-HR | (Jungclaus et al., 2019)                |
| MPI-ESM1-2-LR | (Jungclaus et al., 2019)                |
| NorCPM1       | (Bethke et al., 2019)                   |
| CNRM-CM6-1    | (Voldoire, 2018)                        |
| CNRM-ESM2-1   | (Seferian, 2018)                        |
| MIROC-ES2L    | (Hajima et al., 2019)                   |
| ACCESS-CM2    | (Dix et al., 2019a)                     |

|                   |                                         |
|-------------------|-----------------------------------------|
| AWI-CM-1-1-MR     | (Semmler et al., 2018)                  |
| CMCC-CM2-HR4      | (Scoccimarro et al., 2020)              |
| CMCC-CM2-SR5      | (Lovato et al., 2021a)                  |
| CMCC-ESM2         | (Lovato et al., 2021a)                  |
| EC-Earth3-AerChem | (EC-Earth Consortium (EC-Earth), 2020)  |
| EC-Earth3-CC      | (EC-Earth Consortium (EC-Earth), 2021)  |
| EC-Earth3-Veg-LR  | (EC-Earth Consortium (EC-Earth), 2019b) |
| MPI-ESM-1-2-HAM   | (Neubauer et al., 2019)                 |
| MRI-ESM2-0        | (Yukimoto et al., 2019a)                |
| NorESM2-LM        | (Bethke et al., 2019)                   |
| NorESM2-MM        | (Seland et al., 2019)                   |
| CNRM-CM6-1-HR     | (Voltaire, 2018)                        |
| EC-Earth3-Veg     | (EC-Earth Consortium (EC-Earth), 2019b) |

60

61 **SI Table 7: Table of models and references use to find Hector preindustrial sea surface temperatures.**

62 **3 Temperature Component**

63 Figure 1 demonstrates how a user-defined land-ocean warming ratio affects Hector results. Hector’s SSP2-45 scenario was  
64 run 10 times using land-ocean warming ratios that were uniformly sampled from the (Wallace and Joshi 2018) CMIP5  
65 ensemble range (1.54–1.81). The range in Hector’s global (air), land (air), and sea surface mean temperature anomaly results  
66 were small over the historical period. In 1950 the model spread is 0.001, 0.026, and 0.007 degrees for global, land, and sea  
67 surface temperatures, respectively. This spread increases over the future period and by 2100 the spread is 0.03, 0.49, and  
68 0.11 degrees C for global, land, and sea surface temperatures, respectively. The spread in global temperature is due to  
69 carbon-cycle climate interactions.

70



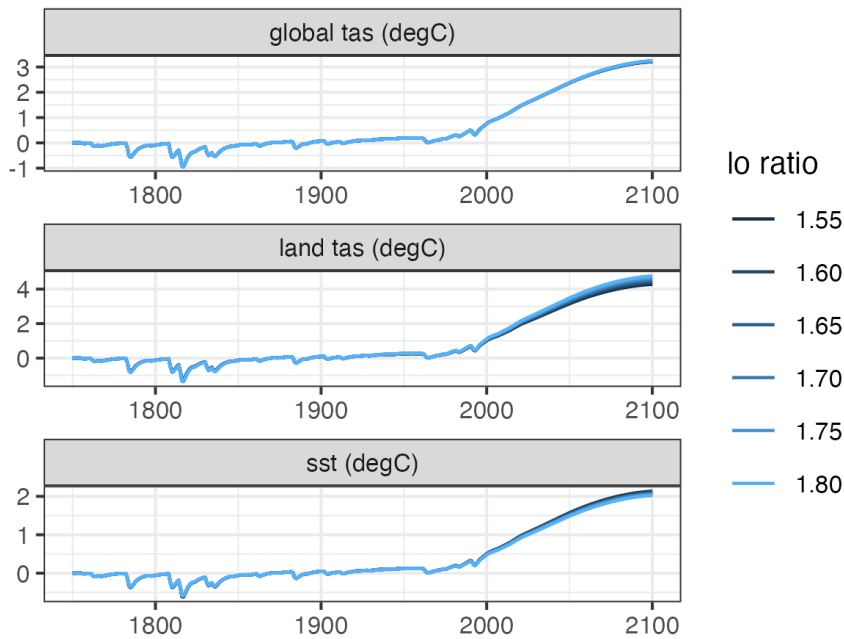

71  
72

73 **SI Figure 1: Hector global mean air, land air, and sea surface temperature anomalies (degrees C) from 1900 to 2100 for 10 SSP2-45**  
 74 **runs. Each run used a different land-ocean warming ratio sampled from the (Wallace and Joshi 2018) CMIP5 ensemble range (1.54–**  
 75 **1.81).**

76 **4 CMIP6 Comparison Information**

| Model           | ECS (C) | Citation                 |
|-----------------|---------|--------------------------|
| ACCESS-CM2      | 4.7     | (Dix et al., 2019b)      |
| ACCESS-ESM1-5   | 3.9     | (Ziehn et al., 2019)     |
| CAMS-CSM1-0     | 2.3     | (Rong, 2019)             |
| CanESM5         | 5.6     | (Swart et al., 2019b)    |
| CESM2           | 5.2     | (Danabasoglu, 2019a)     |
| CESM2-WACCM     | 4.8     | (Danabasoglu, 2019b)     |
| CMCC-CM2-SR5    | 3.52    | (Lovato and Peano, 2020) |
| CMCC-ESM2       | 3.57    | (Lovato et al., 2021b)   |
| HadGEM3-GC31-LL | 5.6     | (Good, 2019)             |

|             |      |                          |
|-------------|------|--------------------------|
| MIROC-ES2L  | 2.7  | (Tachiiri et al., 2019)  |
| MIROC6      | 2.6  | (Shiogama et al., 2019)  |
| MRI-ESM2-0  | 3.2  | (Yukimoto et al., 2019b) |
| NorESM2-MM  | 2.5  | (Bentsen et al., 2019)   |
| TaiESM1     | 4.31 | (Lee and Liang, 2020)    |
| UKESM1-0-LL | 5.3  | (Good et al., 2019)      |

77 **SI Table 8: Summary table of ESM models used to devise the CMIP6 range in Figure 4, the model equilibrium climate sensitivities**  
78 **were obtained from (Schlund et al. 2020), models were categorized according to the IPCC AR6 assessed ranges (Arias et al. 2021).**

| Scenario | Near term, 2021-2004 |                    |                        | Mid-term, 2041-2060 |                    |                        | Long-term, 2081-2100 |                    |                        |
|----------|----------------------|--------------------|------------------------|---------------------|--------------------|------------------------|----------------------|--------------------|------------------------|
|          | Hector               | IPCC Best estimate | IPCC Very likely range | Hector              | IPCC Best estimate | IPCC Very likely range | Hector               | IPCC Best estimate | IPCC Very likely range |
| ssp119   | 1.4                  | 1.5                | 1.2 to 1.7             | 1.5                 | 1.6                | 1.2 to 2.0             | 1.3                  | 1.4                | 1.0 to 1.8             |
| ssp126   | 1.4                  | 1.5                | 1.2 to 1.8             | 1.7                 | 1.7                | 1.3 to 2.2             | 1.6                  | 1.8                | 1.3 to 2.4             |
| ssp245   | 1.4                  | 1.5                | 1.2 to 1.8             | 1.9                 | 2                  | 1.6 to 2.5             | 2.5                  | 2.7                | 2.1 to 3.5             |
| ssp370   | 1.4                  | 1.5                | 1.2 to 1.8             | 2                   | 2.1                | 1.7 to 2.6             | 3.4                  | 3.6                | 2.8 to 4.6             |
| ssp585   | 1.5                  | 1.6                | 1.3 to 1.9             | 2.3                 | 2.4                | 1.9 to 3.0             | 4.2                  | 4.4                | 3.3 to 5.7             |

79 **SI Table 9: Table of average free running Hector global mean surface temperature anomaly relative to the 1850 to 1900 average**  
80 **compared with values from Table SPM.1 of (IPCC 2021).**

## 81 References

82 Bentsen, M., Oliv  , D. J. L., Seland,  ., Toniazzo, T., Gjermundsen, A., Graff, L. S., Debernard, J. B., Gupta, A. K., He, Y.,  
83 Kirkev  g, A., Schwinger, J., Tjiputra, J., Aas, K. S., Bethke, I., Fan, Y., Griesfeller, J., Grini, A., Guo, C., Ilicak, M., Karset,  
84 I. H. H., Landgren, O. A., Liakka, J., Moseid, K. O., Nummelin, A., Spensberger, C., Tang, H., Zhang, Z., Heinze, C.,  
85 Iversen, T., and Schulz, M.: NCC NorESM2-MM model output prepared for CMIP6 ScenarioMIP,  
86 <https://doi.org/10.22033/ESGF/CMIP6.608>, 2019.

87 Bethke, I., Wang, Y., Counillon, F., Kimmritz, M., Fransner, F., Samuelsen, A., Langehaug, H. R., Chiu, P.-G., Bentsen, M.,  
88 Guo, C., Tjiputra, J., Kirkev  g, A., Oliv  , D. J. L., Seland,  ., Fan, Y., Lawrence, P., Eldevik, T., and Keenlyside, N.: NCC  
89 NorCPM1 model output prepared for CMIP6 CMIP historical, <https://doi.org/10.22033/ESGF/CMIP6.10894>, 2019.

90 Danabasoglu, G.: NCAR CESM2 model output prepared for CMIP6 ScenarioMIP,  
91 <https://doi.org/10.22033/ESGF/CMIP6.2201>, 2019a.

92 Danabasoglu, G.: NCAR CESM2-WACCM model output prepared for CMIP6 ScenarioMIP,

- 93 <https://doi.org/10.22033/ESGF/CMIP6.10026>, 2019b.
- 94 Dix, M., Bi, D., Dobrohotoff, P., Fiedler, R., Harman, I., Law, R., Mackallah, C., Marsland, S., O'Farrell, S., Rashid, H.,  
95 Srbinovsky, J., Sullivan, A., Trenham, C., Vohralik, P., Watterson, I., Williams, G., Woodhouse, M., Bodman, R., Dias, F.  
96 B., Domingues, C. M., Hannah, N., Heerdegen, A., Savita, A., Wales, S., Allen, C., Druken, K., Evans, B., Richards, C.,  
97 Ridzwan, S. M., Roberts, D., Smillie, J., Snow, K., Ward, M., and Yang, R.: CSIRO-ARCCSS ACCESS-CM2 model output  
98 prepared for CMIP6 CMIP historical, <https://doi.org/10.22033/ESGF/CMIP6.4271>, 2019a.
- 99 Dix, M., Bi, D., Dobrohotoff, P., Fiedler, R., Harman, I., Law, R., Mackallah, C., Marsland, S., O'Farrell, S., Rashid, H.,  
100 Srbinovsky, J., Sullivan, A., Trenham, C., Vohralik, P., Watterson, I., Williams, G., Woodhouse, M., Bodman, R., Dias, F.  
101 B., Domingues, C. M., Hannah, N., Heerdegen, A., Savita, A., Wales, S., Allen, C., Druken, K., Evans, B., Richards, C.,  
102 Ridzwan, S. M., Roberts, D., Smillie, J., Snow, K., Ward, M., and Yang, R.: CSIRO-ARCCSS ACCESS-CM2 model output  
103 prepared for CMIP6 ScenarioMIP, <https://doi.org/10.22033/ESGF/CMIP6.2285>, 2019b.
- 104 EC-Earth Consortium (EC-Earth): EC-Earth-Consortium EC-Earth3 model output prepared for CMIP6 CMIP historical,  
105 <https://doi.org/10.22033/ESGF/CMIP6.4700>, 2019a.
- 106 EC-Earth Consortium (EC-Earth): EC-Earth-Consortium EC-Earth3-Veg model output prepared for CMIP6 CMIP historical,  
107 <https://doi.org/10.22033/ESGF/CMIP6.4706>, 2019b.
- 108 EC-Earth Consortium (EC-Earth): EC-Earth-Consortium EC-Earth3-AerChem model output prepared for CMIP6 CMIP  
109 historical, <https://doi.org/10.22033/ESGF/CMIP6.4701>, 2020.
- 110 EC-Earth Consortium (EC-Earth): EC-Earth-Consortium EC-Earth-3-CC model output prepared for CMIP6 CMIP historical,  
111 <https://doi.org/10.22033/ESGF/CMIP6.4702>, 2021.
- 112 Good, P.: MOHC HadGEM3-GC31-LL model output prepared for CMIP6 ScenarioMIP,  
113 <https://doi.org/10.22033/ESGF/CMIP6.10845>, 2019.
- 114 Good, P., Sellar, A., Tang, Y., Rumbold, S., Ellis, R., Kelley, D., Kuhlbrodt, T., and Walton, J.: MOHC UKESM1.0-LL  
115 model output prepared for CMIP6 ScenarioMIP, <https://doi.org/10.22033/ESGF/CMIP6.1567>, 2019.
- 116 Hajima, T., Abe, M., Arakawa, O., Suzuki, T., Komuro, Y., Ogura, T., Ogochi, K., Watanabe, M., Yamamoto, A., Tatebe,  
117 H., Noguchi, M. A., Ohgaito, R., Ito, A., Yamazaki, D., Ito, A., Takata, K., Watanabe, S., Kawamiya, M., and Tachiiri, K.:  
118 MIROC MIROC-ES2L model output prepared for CMIP6 CMIP historical, <https://doi.org/10.22033/ESGF/CMIP6.5602>,  
119 2019.
- 120 Jungclaus, J., Bittner, M., Wieners, K.-H., Wachsmann, F., Schupfner, M., Legutke, S., Giorgetta, M., Reick, C., Gayler, V.,  
121 Haak, H., de Vrese, P., Raddatz, T., Esch, M., Mauritsen, T., von Storch, J.-S., Behrens, J., Brovkin, V., Claussen, M.,  
122 Crueger, T., Fast, I., Fiedler, S., Hagemann, S., Hohenegger, C., Jahns, T., Kloster, S., Kinne, S., Lasslop, G., Kornblueh, L.,  
123 Marotzke, J., Matei, D., Meraner, K., Mikolajewicz, U., Modali, K., Müller, W., Nabel, J., Notz, D., Peters-von Gehlen, K.,  
124 Pincus, R., Pohlmann, H., Pongratz, J., Rast, S., Schmidt, H., Schnur, R., Schulzweida, U., Six, K., Stevens, B., Voigt, A.,  
125 and Roeckner, E.: MPI-M MPI-ESM1.2-HR model output prepared for CMIP6 CMIP historical,  
126 <https://doi.org/10.22033/ESGF/CMIP6.6594>, 2019.
- 127 Lee, W.-L. and Liang, H.-C.: AS-RCEC TaiESM1.0 model output prepared for CMIP6 ScenarioMIP,  
128 <https://doi.org/10.22033/ESGF/CMIP6.9688>, 2020.
- 129 Lovato, T. and Peano, D.: CMCC CMCC-CM2-SR5 model output prepared for CMIP6 ScenarioMIP,  
130 <https://doi.org/10.22033/ESGF/CMIP6.1365>, 2020.
- 131 Lovato, T., Peano, D., and Butenschön, M.: CMCC CMCC-ESM2 model output prepared for CMIP6 CMIP historical,

- 132 <https://doi.org/10.22033/ESGF/CMIP6.13195>, 2021a.
- 133 Lovato, T., Peano, D., and Butenschön, M.: CMCC CMCC-ESM2 model output prepared for CMIP6 ScenarioMIP,  
134 <https://doi.org/10.22033/ESGF/CMIP6.13168>, 2021b.
- 135 Neubauer, D., Ferrachat, S., Siegenthaler-Le Drian, C., Stoll, J., Folini, D. S., Tegen, I., Wieners, K.-H., Mauritsen, T.,  
136 Stemmler, I., Barthel, S., Bey, I., Daskalakis, N., Heinold, B., Kokkola, H., Partridge, D., Rast, S., Schmidt, H., Schutgens,  
137 N., Stanelle, T., Stier, P., Watson-Parris, D., and Lohmann, U.: HAMMOZ-Consortium MPI-ESM1.2-HAM model output  
138 prepared for CMIP6 CMIP historical, <https://doi.org/10.22033/ESGF/CMIP6.5016>, 2019.
- 139 Rong, X.: CAMS CAMS-CSM1.0 model output prepared for CMIP6 ScenarioMIP,  
140 <https://doi.org/10.22033/ESGF/CMIP6.11004>, 2019.
- 141 Scoccimarro, E., Bellucci, A., and Peano, D.: CMCC CMCC-CM2-HR4 model output prepared for CMIP6 CMIP historical,  
142 <https://doi.org/10.22033/ESGF/CMIP6.3823>, 2020.
- 143 Seferian, R.: CNRM-CERFACS CNRM-ESM2-1 model output prepared for CMIP6 CMIP historical,  
144 <https://doi.org/10.22033/ESGF/CMIP6.4068>, 2018.
- 145 Seland, Ø., Bentsen, M., Olivie, D. J. L., Toniazzo, T., Gjermundsen, A., Graff, L. S., Debernard, J. B., Gupta, A. K., He, Y.,  
146 Kirkevåg, A., Schwinger, J., Tjiputra, J., Aas, K. S., Bethke, I., Fan, Y., Griesfeller, J., Grini, A., Guo, C., Ilicak, M., Karset,  
147 I. H. H., Landgren, O. A., Liakka, J., Moseid, K. O., Nummelin, A., Spensberger, C., Tang, H., Zhang, Z., Heinze, C.,  
148 Iversen, T., and Schulz, M.: NCC NorESM2-LM model output prepared for CMIP6 CMIP historical,  
149 <https://doi.org/10.22033/ESGF/CMIP6.8036>, 2019.
- 150 Semmler, T., Danilov, S., Rackow, T., Sidorenko, D., Barbi, D., Hegewald, J., Sein, D., Wang, Q., and Jung, T.: AWI AWI-  
151 CM1.1MR model output prepared for CMIP6 CMIP historical, <https://doi.org/10.22033/ESGF/CMIP6.2686>, 2018.
- 152 Shiogama, H., Abe, M., and Tatebe, H.: MIROC MIROC6 model output prepared for CMIP6 ScenarioMIP,  
153 <https://doi.org/10.22033/ESGF/CMIP6.898>, 2019.
- 154 Swart, N. C., Cole, J. N. S., Kharin, V. V., Lazare, M., Scinocca, J. F., Gillett, N. P., Anstey, J., Arora, V., Christian, J. R.,  
155 Jiao, Y., Lee, W. G., Majaess, F., Saenko, O. A., Seiler, C., Seinen, C., Shao, A., Solheim, L., von Salzen, K., Yang, D.,  
156 Winter, B., and Sigmond, M.: CCCma CanESM5 model output prepared for CMIP6 CMIP historical,  
157 <https://doi.org/10.22033/ESGF/CMIP6.3610>, 2019a.
- 158 Swart, N. C., Cole, J. N. S., Kharin, V. V., Lazare, M., Scinocca, J. F., Gillett, N. P., Anstey, J., Arora, V., Christian, J. R.,  
159 Jiao, Y., Lee, W. G., Majaess, F., Saenko, O. A., Seiler, C., Seinen, C., Shao, A., Solheim, L., von Salzen, K., Yang, D.,  
160 Winter, B., and Sigmond, M.: CCCma CanESM5 model output prepared for CMIP6 ScenarioMIP,  
161 <https://doi.org/10.22033/ESGF/CMIP6.1317>, 2019b.
- 162 Tachiiri, K., Abe, M., Hajima, T., Arakawa, O., Suzuki, T., Komuro, Y., Ogochi, K., Watanabe, M., Yamamoto, A., Tatebe,  
163 H., Noguchi, M. A., Ohgaito, R., Ito, A., Yamazaki, D., Ito, A., Takata, K., Watanabe, S., and Kawamiya, M.: MIROC  
164 MIROC-ES2L model output prepared for CMIP6 ScenarioMIP, <https://doi.org/10.22033/ESGF/CMIP6.936>, 2019.
- 165 Tatebe, H. and Watanabe, M.: MIROC MIROC6 model output prepared for CMIP6 CMIP historical,  
166 <https://doi.org/10.22033/ESGF/CMIP6.5603>, 2018.
- 167 Voldoire, A.: CMIP6 simulations of the CNRM-CERFACS based on CNRM-CM6-1 model for CMIP experiment historical,  
168 <https://doi.org/10.22033/ESGF/CMIP6.4066>, 2018.
- 169 Yukimoto, S., Koshiro, T., Kawai, H., Oshima, N., Yoshida, K., Urakawa, S., Tsujino, H., Deushi, M., Tanaka, T., Hosaka,

- 170 M., Yoshimura, H., Shindo, E., Mizuta, R., Ishii, M., Obata, A., and Adachi, Y.: MRI MRI-ESM2.0 model output prepared  
171 for CMIP6 CMIP historical, <https://doi.org/10.22033/ESGF/CMIP6.6842>, 2019a.
- 172 Yukimoto, S., Koshiro, T., Kawai, H., Oshima, N., Yoshida, K., Urakawa, S., Tsujino, H., Deushi, M., Tanaka, T., Hosaka,  
173 M., Yoshimura, H., Shindo, E., Mizuta, R., Ishii, M., Obata, A., and Adachi, Y.: MRI MRI-ESM2.0 model output prepared  
174 for CMIP6 ScenarioMIP, <https://doi.org/10.22033/ESGF/CMIP6.638>, 2019b.
- 175 Ziehn, T., Chamberlain, M., Lenton, A., Law, R., Bodman, R., Dix, M., Wang, Y., Dobrohotoff, P., Srbinovsky, J., Stevens,  
176 L., Vohralik, P., Mackallah, C., Sullivan, A., O'Farrell, S., and Druken, K.: CSIRO ACCESS-ESM1.5 model output  
177 prepared for CMIP6 ScenarioMIP, <https://doi.org/10.22033/ESGF/CMIP6.2291>, 2019.
- 178
